# Supplementary material for: Distinct cell death pathways induced by granzymes collectively protect against intestinal Salmonella infection
Source: PubMed Central journal article supplement (PMC11631773; doi:10.1016/j.mucimm.2024.08.006), 2024-12
Supplement: mmc1.pdf [file mmc1.pdf]

## Supplementary Information

### Distinct cell death pathways induced by granzymes collectively protect against intestinal *Salmonella* infection

Amanpreet Singh Chawla, Maud Vandereyken, Maykel Arias, Llipsy Santiago, Dina Dikovskaya, Chi Nguyen, Neema Skariah, Nicolas Wenner, Natasha B. Golovchenko, Sarah J. Thomson, Edna Ondari, Marcela Garzón-Tituaña, Christopher J. Anderson, Megan Bergkessel, Jay C. D. Hinton, Karen L. Edelblum, Julian Pardo, Mahima Swamy

#### Graphical abstract

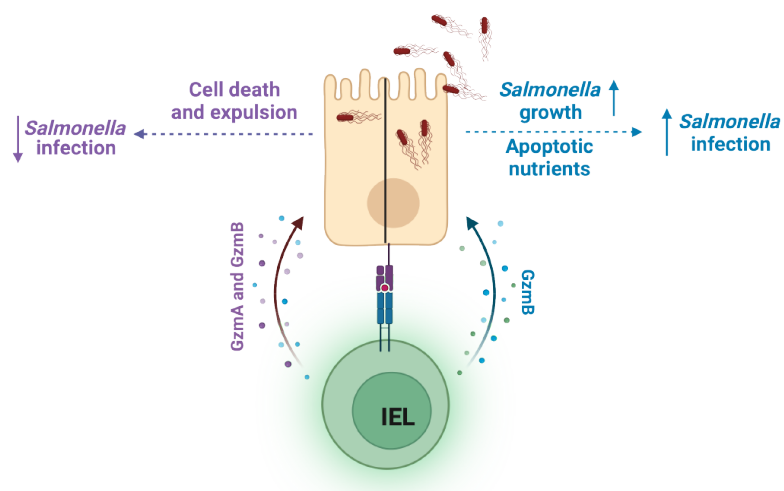

Supplementary Figure 1

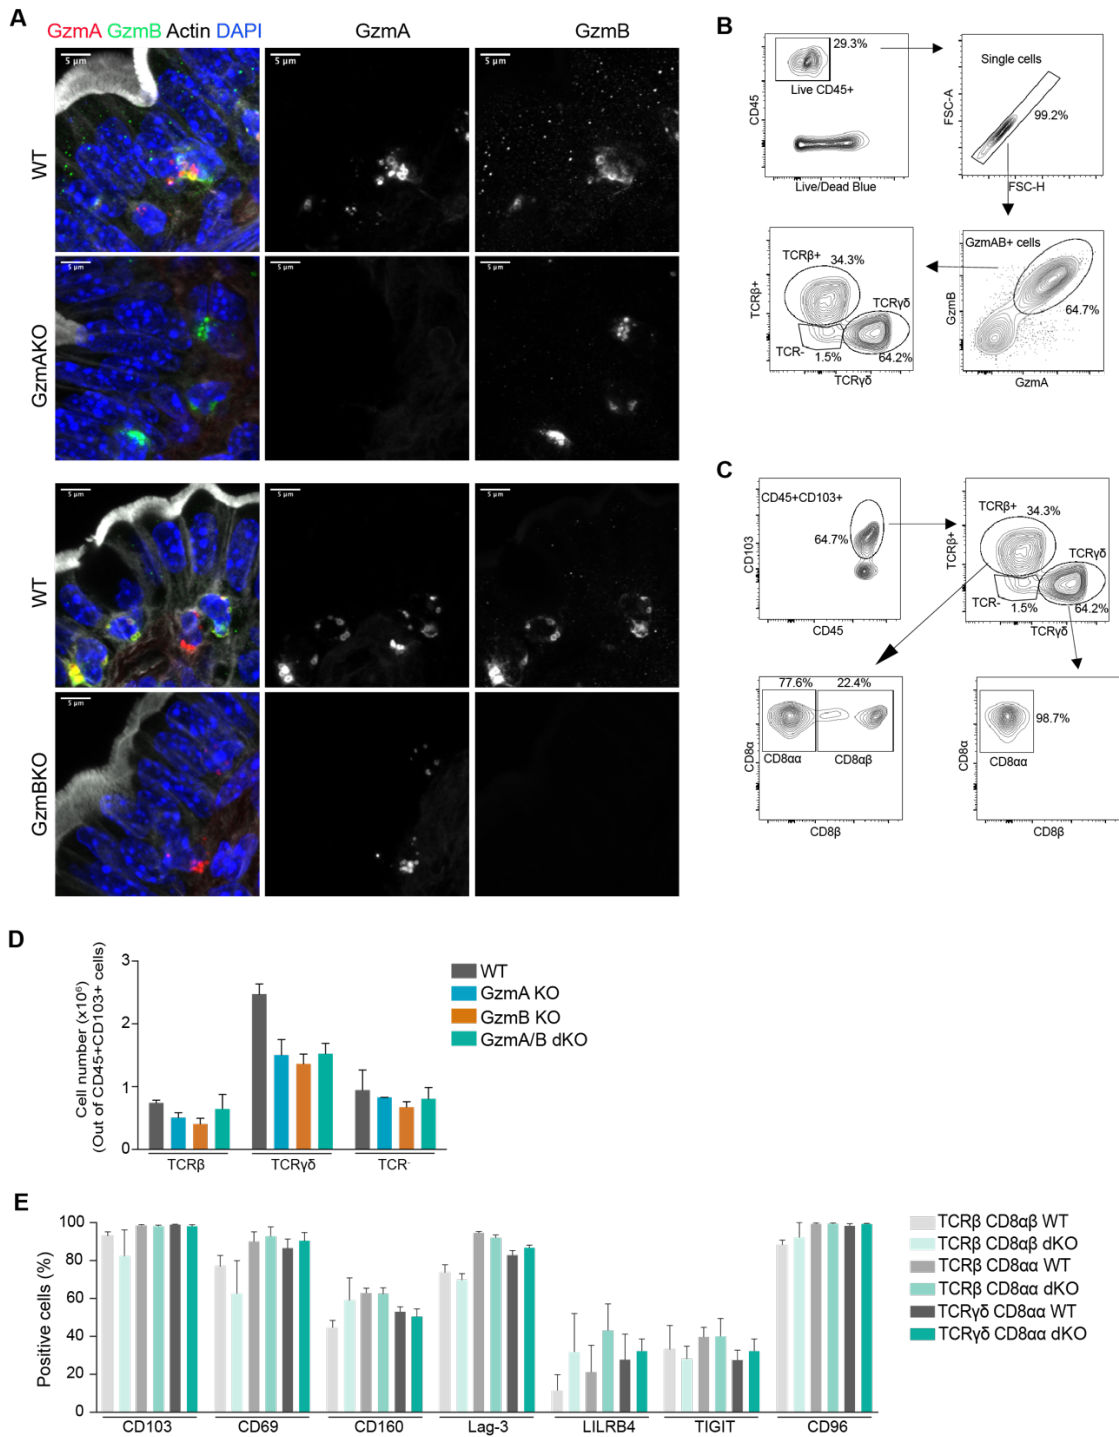

**Supplementary Figure 1. A.** Representative immunofluorescent micrographs to confirm the specificity of the GzmA and GzmB antibodies. Images show cells expressing GzmA (red) and GzmB (green) in the epithelial layer of a jejunal villus in WT, GzmA KO and GzmB KO. Sections were counterstained with phalloidin to show actin (white) and DAPI to show nuclei (blue on left panel). Scale bar=5μm. **B.** Gating strategy of GzmA/B<sup>+</sup> cells in the small intestine epithelium. Total CD45<sup>+</sup> were gated as live, single, GzmAB<sup>+</sup> cells. These GzmA/B<sup>+</sup> cells can be further divided into TCRβ<sup>+</sup>, TCRγδ<sup>+</sup> and TCR<sup>-</sup> subsets. **C.** Gating strategy of IEL in the small intestine - Total IEL were gated as live, single cell, CD45<sup>+</sup>CD103<sup>+</sup> cells. CD45<sup>+</sup>CD103<sup>+</sup> cells can be further subdivided into TCRβ<sup>+</sup> (CD8αα<sup>+</sup> and CD8αβ<sup>+</sup>),

TCR $\gamma\delta^+$  (CD8 $\alpha\alpha^+$  and CD8 $\alpha\beta^+$ ) and TCR $^-$  subsets. **D.** Absolute numbers of CD103 $^+$  IEL in WT littermate controls, GzmA KO, GzmB KO and GzmA/B dKO mice, with gating strategy shown in Suppl. Fig 1C **E.** Comparison of the percentage of positive WT and GzmA/B dKO IEL, from co-housed mice, for CD103, CD69, CD160, Lag-3, LILRB4, TIGIT and CD96 surface markers (n=3 each), with gating strategy shown in Suppl. Fig 1C. All data are presented as mean  $\pm$  SEM. P values were calculated for (C-D) by ordinary one-way ANOVA with Sidak's multiple comparisons. Where no p-values are shown, no significance was found.

Supplementary Figure 2

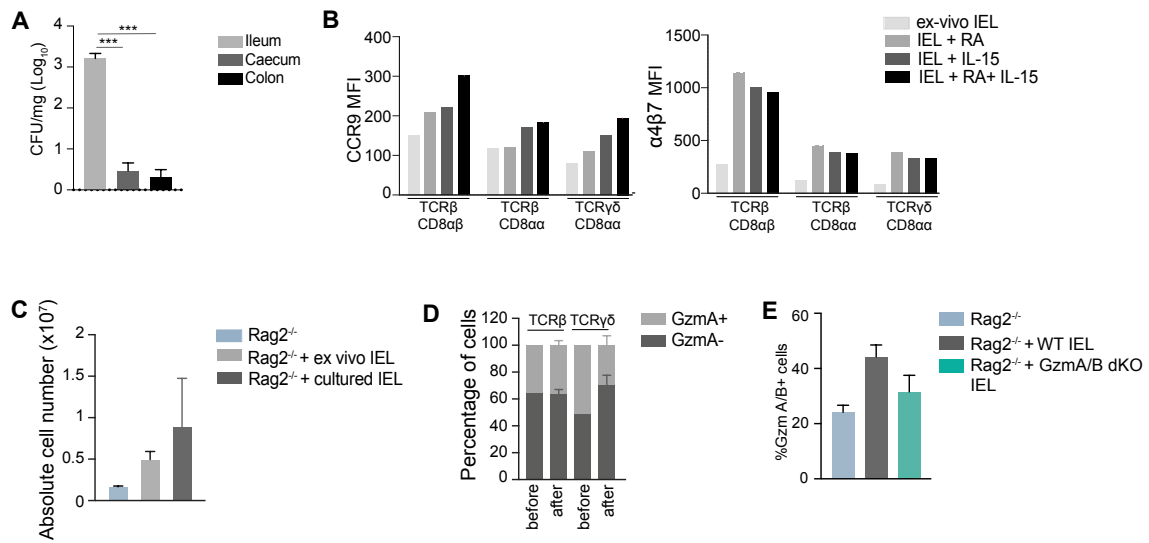

**Supplementary Figure 2. A.** Bar graph showing total bacterial (SL1344) counts in ileum, caecum, and colon of WT mice 4 days post infection (n=6). **B.** Comparison of the expression of CCR9 (left panel) and  $\alpha 4\beta 7$  (right) on ex vivo IEL and IEL cultured with retinoic acid and 100 ng/ml IL-15/R $\alpha$ . **C.** Bar graph showing the number of CD45<sup>+</sup> cells collected in the SI epithelium after ex-vivo (n=3) or cultured (n=2) IEL transfer into Rag2<sup>-/-</sup> mice. **D.** Competitive transfer of cultured WT and Gzma/B dKO IEL (from co-housed mice) into Rag2<sup>-/-</sup> mice. WT and Gzma/B dKO IEL were mixed at a ratio of 1:1 before the transfer. Bar graphs show the ratio of Gzma positive cells in the TCR $\beta$  and TCR $\gamma\delta$  populations, in the 1:1 mix before the transfer (n=2) and 4 weeks after the transfer, isolated from the adoptively transferred Rag2<sup>-/-</sup> mice (n=4). All data are presented as mean  $\pm$  SEM. **E.** Percentages of Gzma/B<sup>+</sup> cells out of CD45<sup>+</sup> cells isolated from the small intestinal epithelia of Rag2<sup>-/-</sup> mice, and from Rag2<sup>-/-</sup> mice that received IEL from either WT or Gzma/B dKO mice 4 weeks earlier, and that were then infected with SL1344. These data are from the mice shown in Fig. 2G-I. P values were calculated for (A) using ordinary one-way ANOVA with Sidak's multiple comparisons. \*\*\* p<0.001.

### Supplementary Figure 3

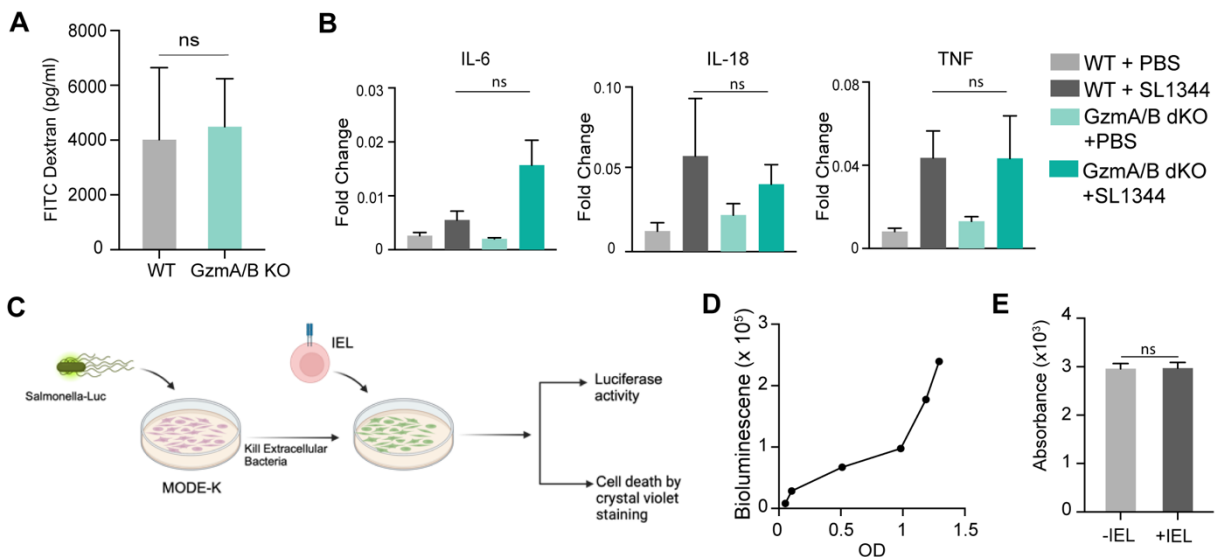

**Supplementary Figure 3. A.** Bar graphs comparing intestinal permeability in cohoused naïve WT and GzmA/B dKO mice ( $n=5/\text{group}$ ). The concentration of FITC dextran was measured in the serum of the mice 4h after the gavage. **B.** Transcript fold change in the IL-6, IL-18 and TNF in small intestinal tissue of cohoused WT and GzmA/B dKO mice 3 days post *Salmonella* infection ( $n=3/\text{group}$ ). **C.** Schematic showing the set-up of invitro MODE-K killing assay by IEL. MODE-K was infected with SL1344-lux for 0.5 h and then extracellular bacteria was killed using gentamycin. IEL were added to infected MODE-K and bioluminescence was acquired at different time points. **D.** Graph showing the correlation between bacterial OD and bacterial bioluminescence. **E.** IEL do not kill uninfected MODE-K. Bar graph showing the survival, measured using crystal violet method, of uninfected MODE-K in the presence or absence of WT IEL ( $n=3/\text{group}$ ). All data are presented as mean  $\pm$  SEM. P values were calculated for (A and E) using unpaired t-test and for (B) ordinary one-way ANOVA with Sidak's multiple comparisons. ns, not significant.

### Supplementary Figure 4

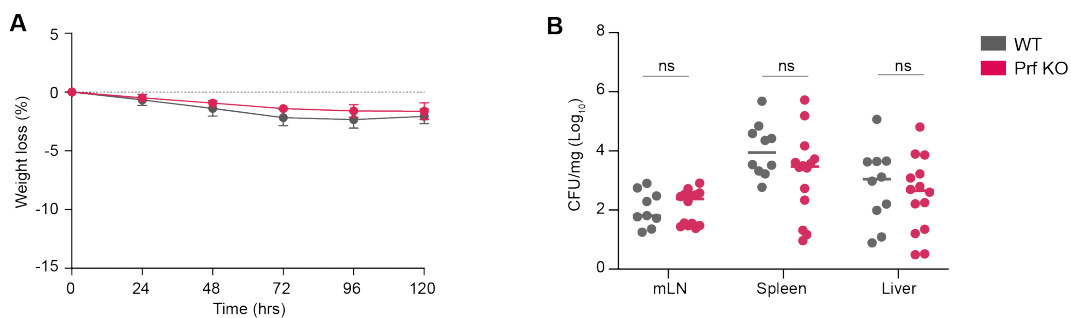

**Supplementary Figure 4.** Cohoused WT ( $n=10$ ) and Prf1 KO ( $n=14$ ) mice were orally infected with SL1344-GFP and culled 5dpi. Weight loss (**A**) and CFU/mg in MLN, spleen and liver at the time of sacrifice (**B**) are shown. Data were pooled from 2 independent experiments. All data are presented as mean  $\pm$  SEM. P values were calculated for bacterial counts using the Mann-Whitney U-test and for all other comparisons, two-way ANOVA was used, with multiple comparisons using Sidak's multiple comparisons tests. ns: not significant.

Supplementary Figure 5

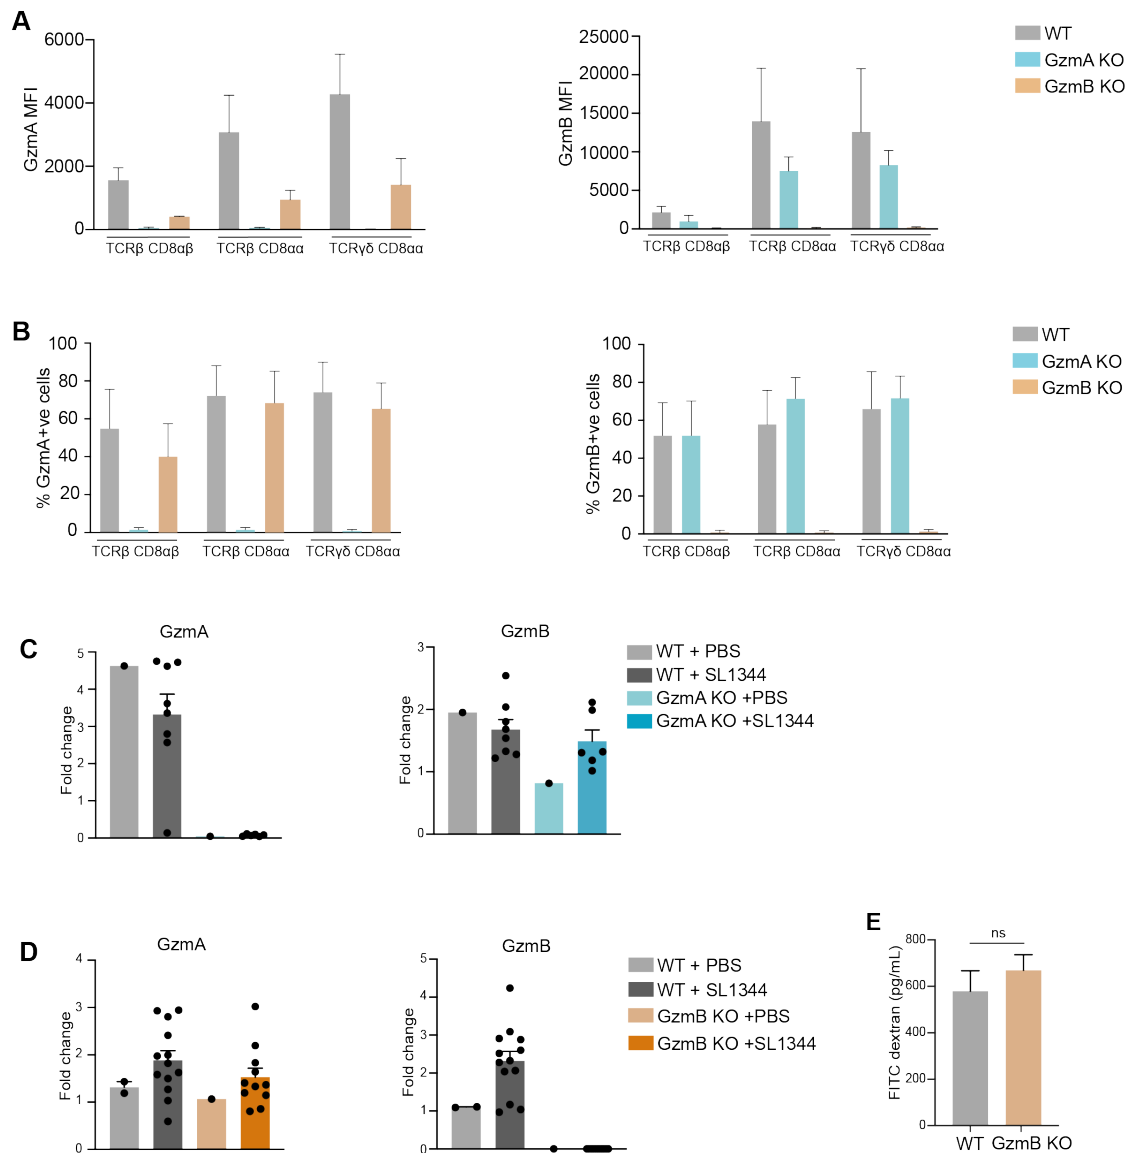

**Supplementary Figure 5. A.** Mean fluorescent intensity (MFI) of Gzma (left panel) and Gzmb (right panel) in naïve Gzma KO (n=3), Gzmb KO (n=2) compared to their WT littermate controls (n=3) mice. **B.** Comparison of the percentage of Gzma<sup>+</sup> (left panel) or Gzmb<sup>+</sup> (right panel) IEL in Gzma KO, Gzmb KO, and WT littermate controls (n>5/strain). **C-D.** Transcript fold change in *Gzma* and *Gzmb* in Gzma KO (C) and Gzmb KO (D) as compared to WT littermate controls 5 days post *Salmonella* infection from mice in figure 4. **E.** Dot plots comparing intestinal permeability in naïve Gzmb KO and WT littermate control mice (n=5/group). The concentration of the FITC dextran was measured in the serum of the mice 4h after the gavage. Data were pooled from 2 independent experiments. All data are represented as mean ± SEM, except A where it is represented as mean ± SD. P-values were calculated for (B) by ordinary one-way ANOVA with Sidak's multiple comparisons, (C) by unpaired t-test. ns: not significant. Where no p-values are shown, no significance was found.

Supplementary Figure 6

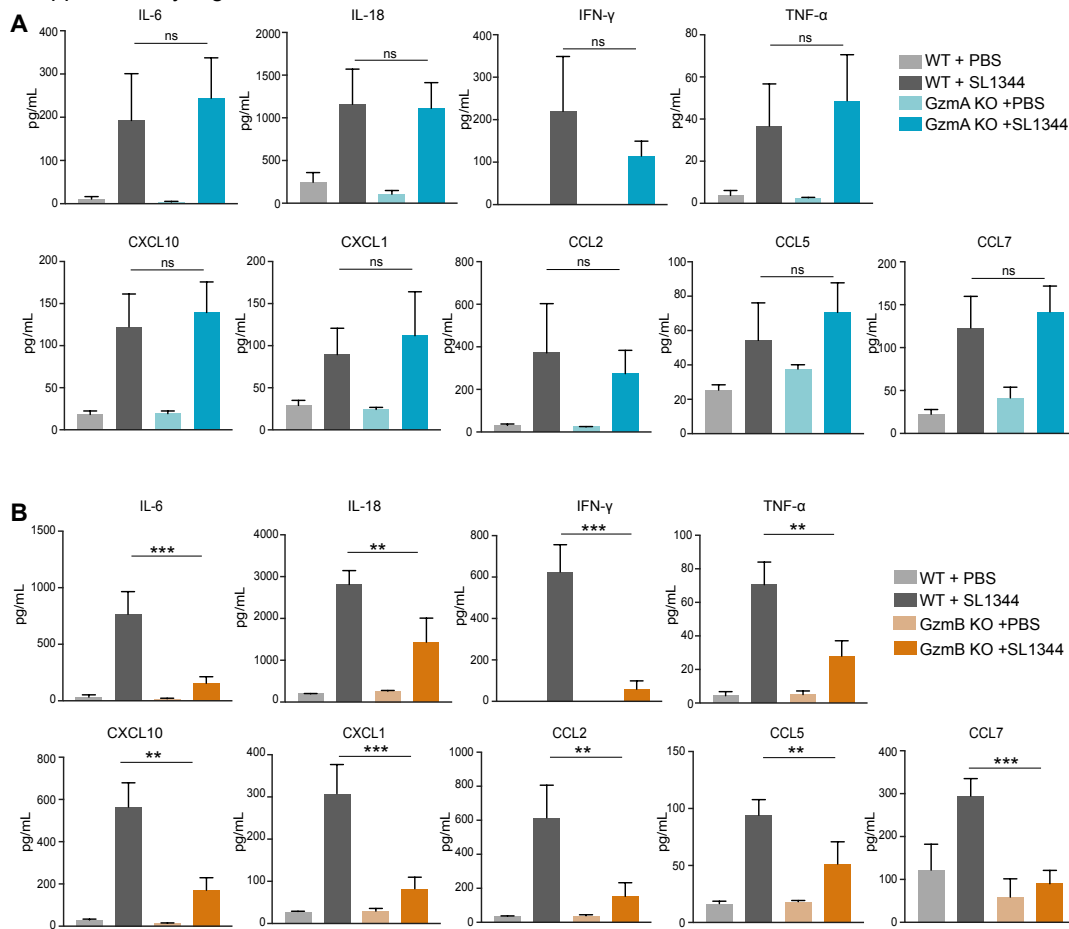

**Supplementary Figure 6.** Chemokine and cytokine levels in plasma of naïve and orally infected (**A**) GzmA sKO (n=12) and (**B**) GzmB sKO (n=12), compared to their WT littermate controls (n>9) mice from figure 4, 5 days post oral *Salmonella* infection. All data are represented as mean  $\pm$  SEM. P-values were calculated for (A-B) by ordinary one-way ANOVA with Sidak's multiple comparisons, (C) by unpaired t-test. Standard annotations were used to denote significance: ns, not significant, \*\* p<0.01, \*\*\* p<0.001.

**Supplementary videos 2 and 3.** Representative time-lapse confocal microscopy videos of either (**2**) co-housed WT or (**3**) GzmA/B dKO IEL (in green) co-cultured with WT enteroids. Frames were acquired every 2.5 minutes for 90 min.
